# Supplementary material
Source: MDPI journal article supplement (https://www.mdpi.com/2673-9984/2/1/58)
Supplement: s1 [file s1]

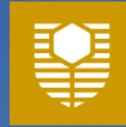

Curtin University

# Scientific concepts within reach of young learners: Support from educational research literature.

David F Treagust, Curtin University Perth, Australia

February 22-28, 2021

ECU 2021

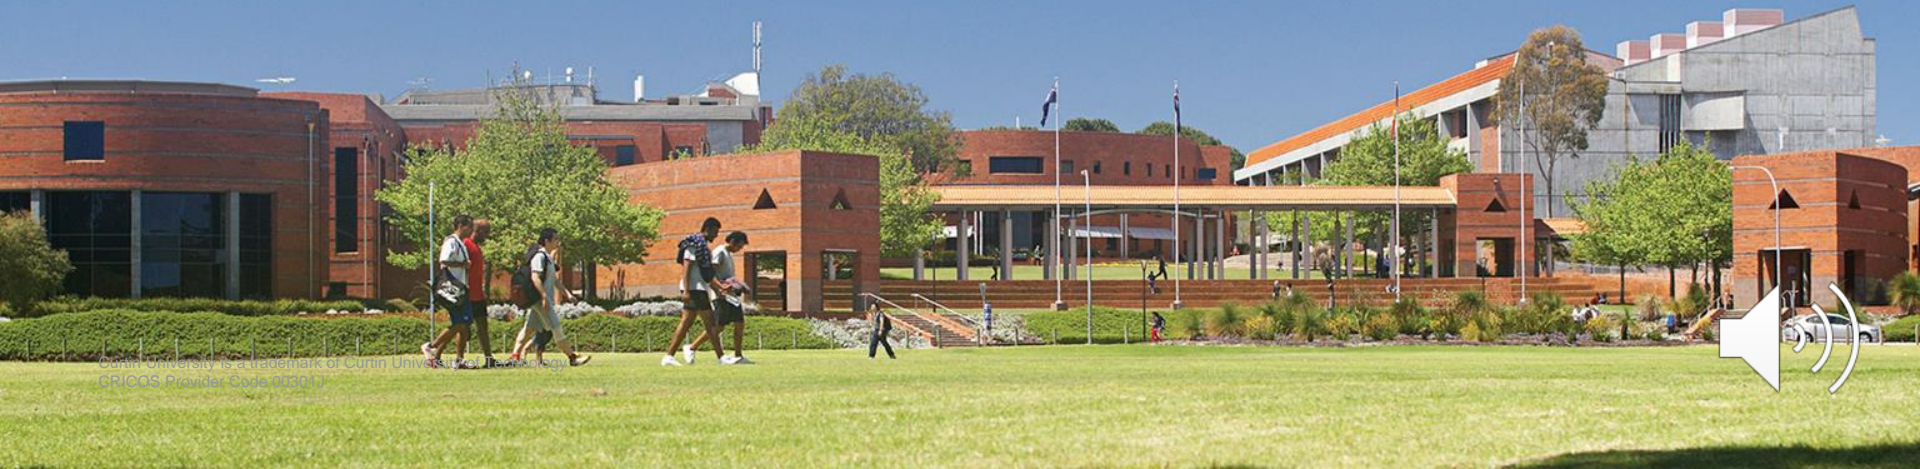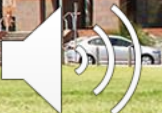

# Overview of this presentation

- I am a participant in the curriculum development and research project funded by the Australian Research Council led by David Blair at the University of Western Australia.
- This project is designed to modernise physical science teaching in schools by including Einsteinian concepts of space, time, matter and radiation.
- From our recent classroom-based work and that of others we have demonstrated how learning these concepts is possible.
- Now we are implementing in many schools with teachers of Year 3-10 students
- In this short presentation, I provide supporting evidence from the educational research literature that primary and lower secondary students are capable of learning abstract concepts given appropriate supportive learning environments
- Rather than provide a comprehensive literature review, I am basing my comments on the substantial work of Kathleen Metz, UC Berkeley, including the use of 'within reach' aspect in the title of this talk.

# Piaget's stages of logical-mathematical structures and related learning opportunities

- **Positive outcomes**

Research on educational development based on Piaget's ideas has benefitted science teachers and young science learners with many new and improved science curricula and teaching methods.

- **Negative outcomes**

Implied restrictions of some children's learning due to age/stage of development  
Observations that children's learning that did not neatly fit these cognitive stages

- **Considerations** (From Metz 1998 p. 81)

Piaget focussed on development not learning

The developmental theory focussed on a child working alone

Need to consider how children think and can understand with effective instruction

Children best learn collaboratively

# Challenges to Piaget's stage theory from research with primary school children (Metz, 1995)

- Using elementary science processes for the first years of schooling and **postponing integrated practice until the higher grades** results in decomposition and decontextualization in the teaching and learning of scientific inquiry. (p. 152)
- In this way, young children engage in science activities such as observation and categorization without a rich goal structure or purpose
- This practice is detrimental from cognitive, motivational, and epistemological perspectives. (p. 152)
- Shortcomings in performance are attributed to the child's stage ---- these shortcomings will disappear with cognitive development. (p. 160)
- Research frequently confounds weak knowledge with developmentally based cognitive deficiencies (p. 160)

# Domain-specific knowledge and collaborative cognition (Metz, 1995, p. 93)

- Domain-specific knowledge has an impact on the adequacy of children's scientific inquiry
- We cannot assume children are incapable of some form of inquiry without having an understanding of the domain.
- Scaffolding children's deep exploration in a few domains supports inquiry
- Collaboration between children can raise the level of the cognitive task
- Make effective use of the social context to build up children's emergent domain-specific knowledge and scientific inquiry processes.

# Design principles for teaching young children scientific ideas (Metz 2019 p. 588)

- The recommendation is to frame instruction that systematically engages students' intuitions and emergent ideas.
- Develop children's conceptual understanding and explanatory power in the context of scientific knowledge-building practices.
- Design instruction to problematize key ideas within the children's participation in scientific practices.
- Maximize the power of children's reasoning within these practices by concentrating their inquiry within a single domain
- There is considerable plasticity in young children's capacity to understand abstract scientific ideas, given sufficiently powerful instructional conditions. (Metz, 2019, p. 611)

# How EinsteinFirst is acknowledging and addressing these issues

- Activities are designed to use children's natural curiosity
- Children are engaged in scientific practices, frequently in group class activities
- Curriculum materials focus on a single domain – for example, introducing particle concepts in Year 3 and developing these ideas over 8 lessons.
- Through songs and games children become familiar with the concepts of simple molecules.
- Teaching support materials and teacher professional development are an integral part of the learning environment



# References

- Metz, K. E. (1995). Re-assessment of developmental assumptions in children's science instruction. *Review of Educational Research*, 65(2), 93–127.
- Metz, K. E. (1997). On the complex relation between cognitive developmental research and children's science curricula. *Review of Educational Research*, 67(1), 151–163.
- Metz, K. E. (1998). Scientific inquiry within reach of young children. In B. J. Fraser and K. G. Tobin (Eds.) *International Handbook of Science Education* (pp. 81-96). Dordrecht, The Netherlands; Kluwer Academic Publishers
- Metz, K. E., Cardace, A., Berson, E., Ly, U., Wong, N., Sisk-Hilton, S., Metz, S. E. & Wilson, M. (2019). Primary grade children's capacity to understand microevolution: the power of leveraging their fruitful intuitions and engagement in scientific practices, *Journal of the Learning Sciences*, 28, 4-5, 556-615, DOI: 10.1080/10508406.2019.1667806
